# Supplementary material for: Boosting charge transfer in Au-decorated B/K co-doped CN nanosheets towards enhanced photocatalytic CO2 reduction
Source: Royal Society of Chemistry journal article supplement (doi:10.1039/d3qm00056g), 2023-01-01
Supplement: d3qm00056g1.pdf [file d3qm00056g1.pdf]

Electronic supplementary information (ESI)

**Boosting charge transfer in Au-decorated B/K co-doped CN  
nanosheets towards enhanced photocatalytic CO<sub>2</sub> reduction**

Xiangli Shi<sup>a</sup>, Qiong Zhang<sup>a</sup>, Yimeng Zhou<sup>b</sup>, Qianjin Ye<sup>b</sup>, Deli Jiang<sup>b,\*</sup>, Dan Tian<sup>c</sup>,  
and Di Li<sup>a,\*</sup>

<sup>a</sup> *School of Chemistry and Chemical Engineering, Jiangsu University, 301 Xuefu Road, Zhenjiang 212013, China*

<sup>b</sup> *Institute for Energy Research, Jiangsu University, 301 Xuefu Road, Zhenjiang 212013, China*

<sup>c</sup> *College of Materials Science and Engineering, Nanjing Forestry University, Nanjing 210037, China*

Corresponding authors: Deli Jiang, Di Li

E-mail addresses: dlj@ujs.edu.cn (D. Jiang), cfbgdd@sina.com (D. Li)

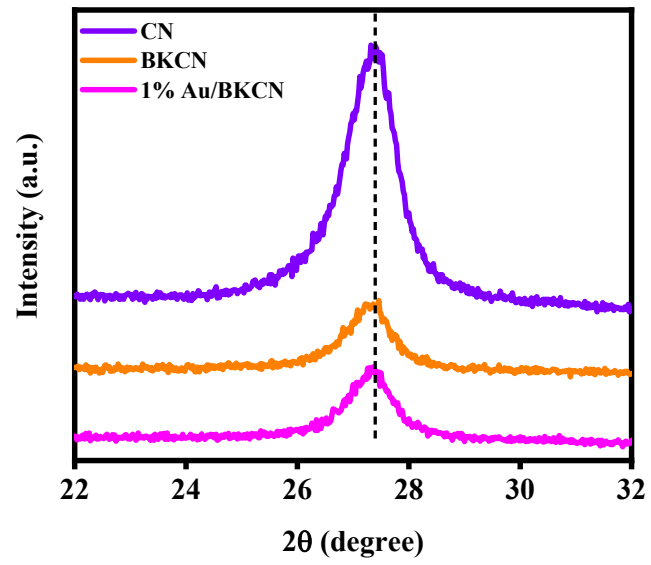

**Fig. S1** Enlarged (002) diffraction peak of CN, BKCN and 1% Au/BKCN.

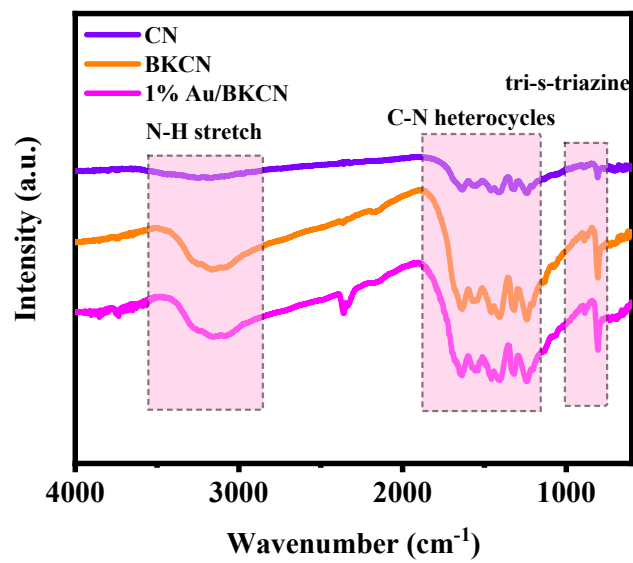

**Fig. S2** FTIR spectra of CN, BKCNC and 1% Au/BKCNC.

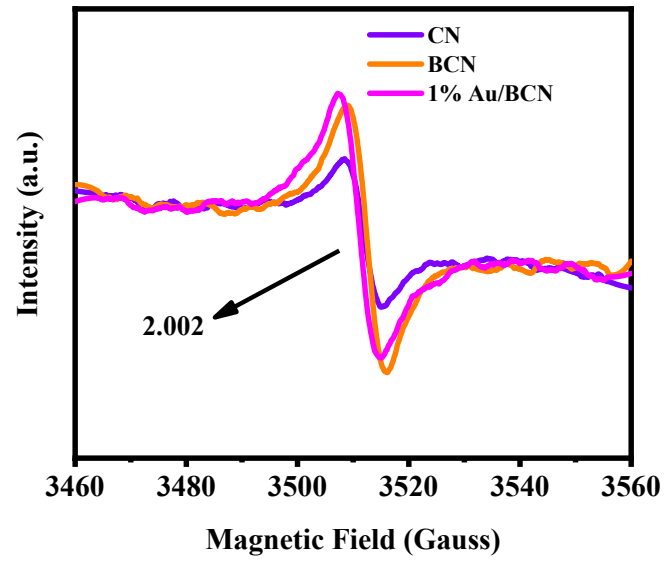

**Fig. S3** EPR spectra of CN, BKCEN and 1% Au/BKCEN.

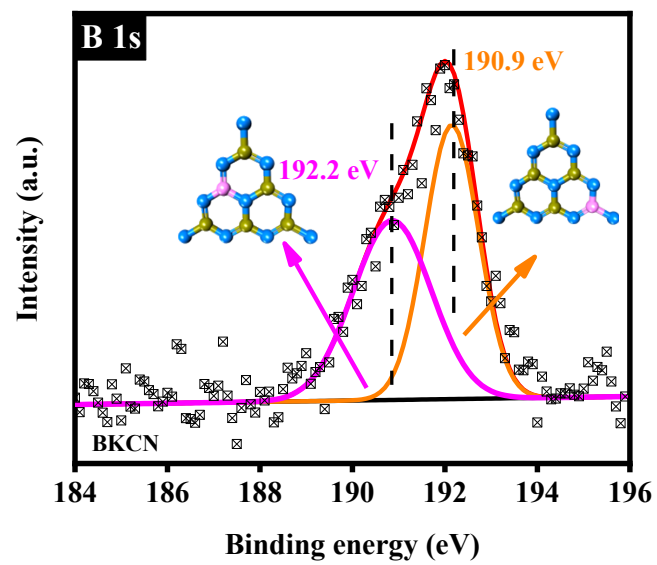

Fig. S4 High-resolution B 1s XPS spectrum of BKCN.

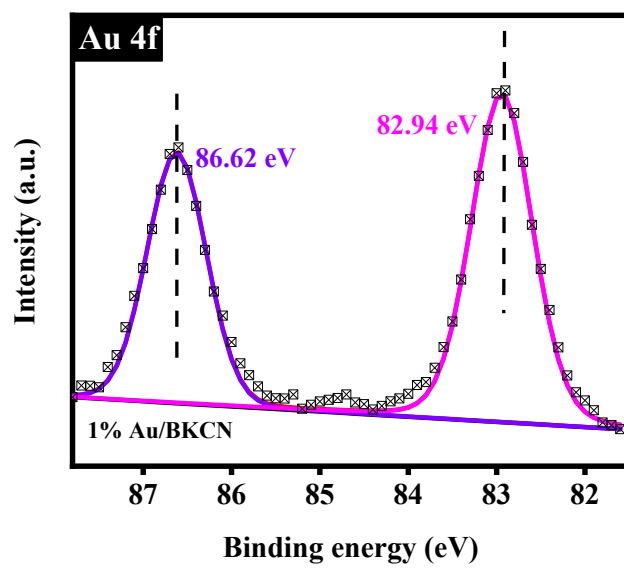

**Fig. S5** High-resolution Au 4f XPS spectrum of 1% Au/BKCN.

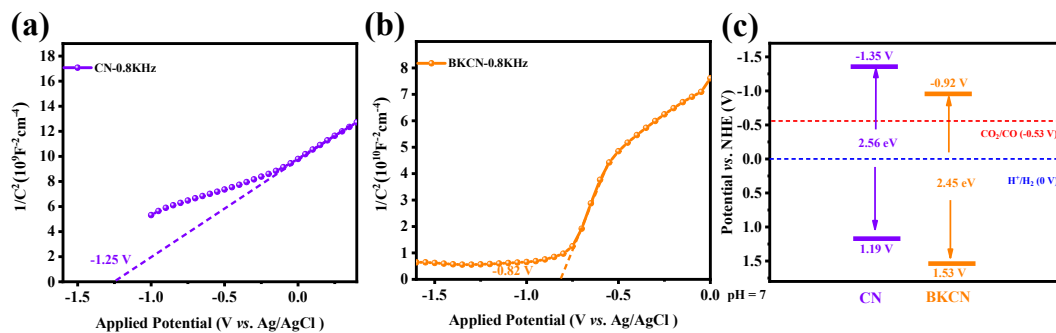

**Fig. S6** Mott-Schottky plot of pristine (a) CN and (b) BKCNC, and (c) schematic illustration of the band structure of CN and BKCNC.

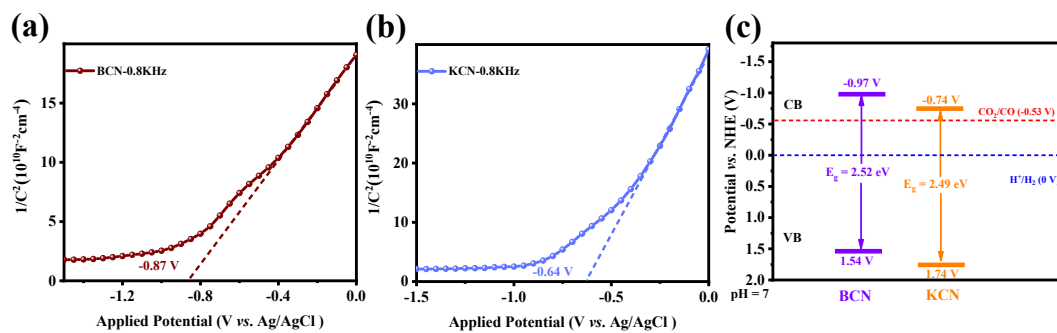

**Fig. S7** Mott-Schottky plot of (a) pristine BCN and (b) KCN, and (c) schematic illustration of the band structure of BCN and KCN.



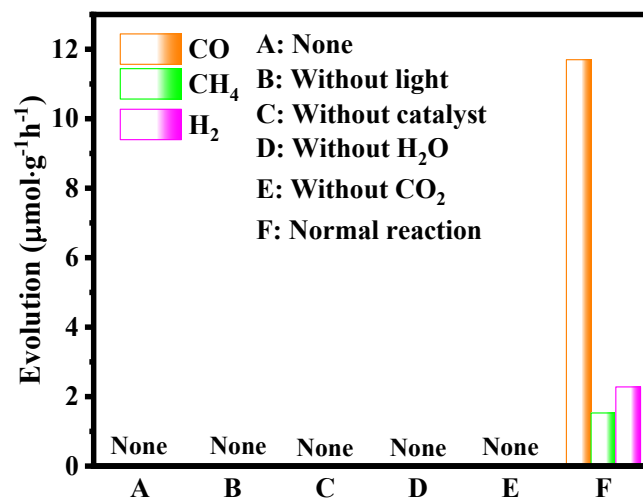

**Fig. S8** Photocatalytic CO<sub>2</sub> reduction performance of 1% Au/BKCN under different condition.

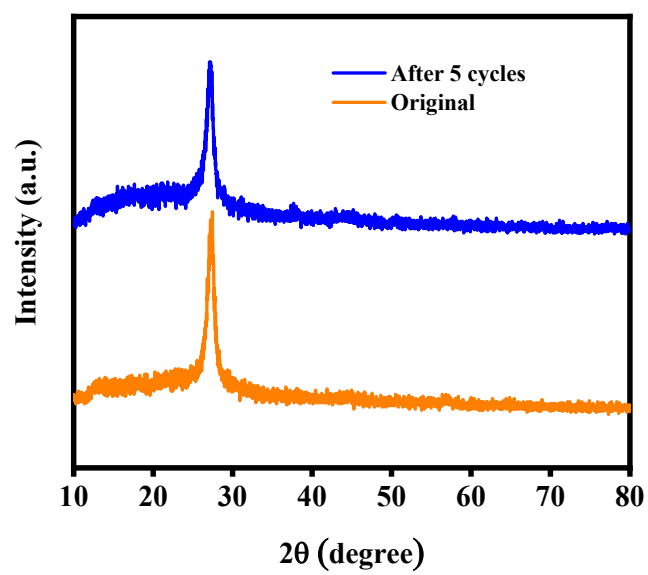

**Fig. S9** XRD patterns of 1% Au/BKCN before and after 5 cycles.

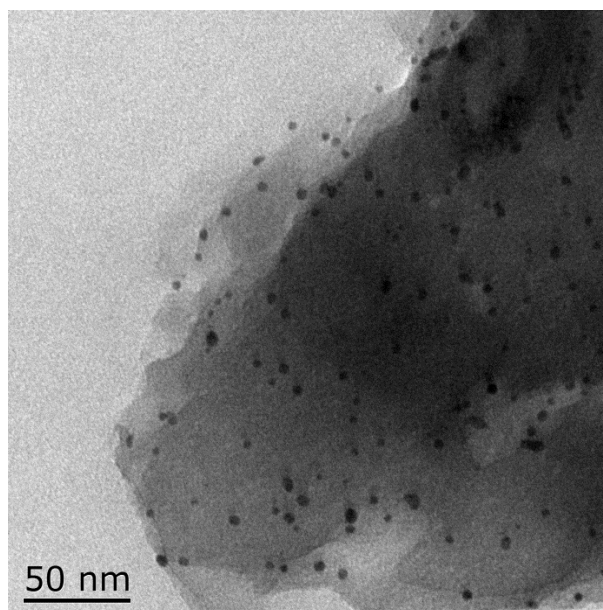

**Fig. S10** TEM image of 1% Au/BKCN photocatalyst after five times cycles.

**Fig. S11** (a) Products yield of CN, BKCN and 1% Au/BKCN samples through a 500 nm band pass filter. (b) Proposed mechanism for the photocatalytic CO<sub>2</sub> reduction over Au/BKCN under 550 nm monochromatic light.

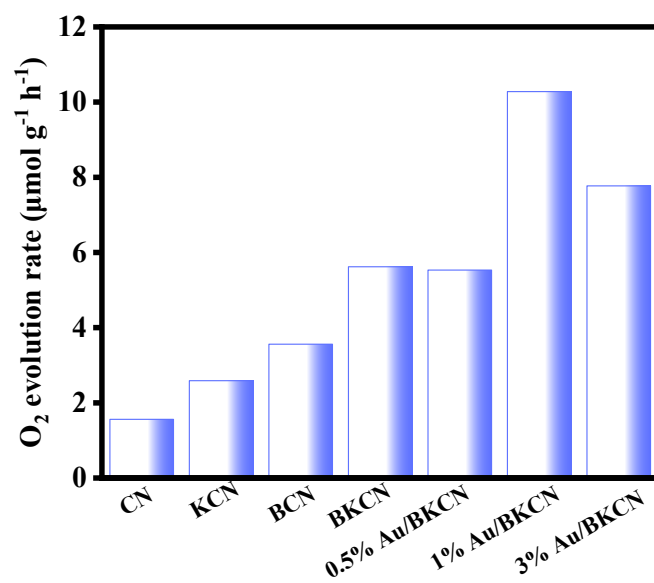

Fig. S12 Yields of O<sub>2</sub> in CO<sub>2</sub> photoreduction.

**Table S1.** ICP-OES measured Au contents in the as-prepared photocatalysts.

| sample       | Theoretical Au content<br>(wt.%) | Actual Au content<br>(wt.%) |
|--------------|----------------------------------|-----------------------------|
| CN           | 0                                | 0                           |
| BCN          | 0                                | 0                           |
| KCN          | 0                                | 0                           |
| BKCN         | 0                                | 0                           |
| 1% Au/CN     | 1.000                            | 0.960                       |
| 1% Au/BCN    | 1.000                            | 1.020                       |
| 1% Au/KCN    | 1.000                            | 0.930                       |
| 0.5% Au/BKCN | 0.500                            | 0.550                       |
| 1% Au/BKCN   | 1.000                            | 0.980                       |
| 3% Au/BKCN   | 3.000                            | 2.970                       |

**Table S2.** Charge carriers lifetime parameters of CN, BKCN, and 1% Au/BKCN.

| Sample     | A <sub>1</sub> | A <sub>2</sub> | τ <sub>1</sub> (ns) | τ <sub>2</sub> (ns) | τ <sub>ave</sub> (ns) |
|------------|----------------|----------------|---------------------|---------------------|-----------------------|
| CN         | 36.59          | 46.77          | 1.9287              | 6.0092              | 5.190                 |
| BKCN       | 39.97          | 46.78          | 1.7244              | 5.7325              | 4.913                 |
| 1% Au/BKCN | 42.44          | 43.14          | 1.7371              | 5.6751              | 4.746                 |

*Analysis method of time-resolved PL spectra*

a “biexponential” function was used to fit the decay curves as follows:

$$\text{Fit} = A_1 e^{-t/\tau_1} + A_2 e^{-t/\tau_2}$$

Where the shorter decay lifetime (τ<sub>1</sub>) is attributed to the non-radiative relaxation process, and the longer decay lifetime (τ<sub>2</sub>) comes from the radiative process which is related to the direct recombination of photoinduced charge carriers. A<sub>1</sub> and A<sub>2</sub> are constants related to non-radiative and radiative relaxation processes, respectively. The average charge carrier lifetime (τ<sub>ave</sub>) can be calculated from the equation as follows: [τ<sub>ave</sub> = (A<sub>1</sub>τ<sub>1</sub><sup>2</sup> + A<sub>2</sub>τ<sub>2</sub><sup>2</sup>)/(A<sub>1</sub>τ<sub>1</sub> + A<sub>2</sub>τ<sub>2</sub>)].

### External Quantum Efficiency (EQE) Measurement:

The external quantum efficiency for the photocatalytic CO<sub>2</sub> reduction was determined at 500 nm measured using a single band pass filter by using the same photochemical experimental setup. An area of 38.48 cm<sup>2</sup> was illuminated and the light intensity was measured with a solar power meter (SM206-SOLAR). Light intensity was determined to be 11.6 W·m<sup>-2</sup>. After 5 h irradiation, the CO, CH<sub>4</sub> and H<sub>2</sub> was measured to be 1.6, 0.01, and 0.005 μmol. EQE were calculated using the following equation:

$$EQE(\%) = N_{electron}/N_{photon}$$

The photocatalytic electron consumption ( $N_{electron}$ ) is calculated using the equation:

$$N_{electron} = [2N(CO) + 8N(CH_4) + 2N(H_2)] \times N_A$$

Where,  $N(CO)$ ,  $N(CH_4)$ , and  $N(H_2)$  are the number of moles CO, CH<sub>4</sub>, H<sub>2</sub> produced respectively,  $N_A$  is Avogadro's number

The photons flux ( $N_{photon}$ ) is calculated using the equation:

$$N_{photon} = (t \times I \times \lambda \times A)/(h \times c)$$

Where,  $t$  is reaction time,  $I$  is intensity of light,  $\lambda$  is the wavelength of incident light, and  $A$  is the irradiated area,  $h$  is Planck constant,  $c$  is speed of light. Thus, the external quantum efficiency is estimated to be 0.098%.



**Table S3.** Comparison of photocatalytic CO<sub>2</sub> reduction based on heteroatoms doped g-C<sub>3</sub>N<sub>4</sub>.

| catalyst                               | light source                           | product                          | reduction yield( $\mu\text{mol g}^{-1}$ ) | Ref.             |
|----------------------------------------|----------------------------------------|----------------------------------|-------------------------------------------|------------------|
| Cl-CN                                  | UV (8 W)                               | CO                               | 39.9                                      | [1]              |
| O-CN                                   | 350 W Xe lamp ( $\lambda \geq 420$ nm) | C <sub>2</sub> H <sub>5</sub> OH | 4.4                                       | [2]              |
| Au/g-C <sub>3</sub> N <sub>4</sub>     | UV-light (300 W)                       | CO                               | 16.5                                      | [3]              |
| 12FLTC/BCN                             |                                        | CO                               | 14.4                                      | [4]              |
| AUNB/g-C <sub>3</sub> N <sub>4</sub>   | AM 1.5                                 | CO                               | 21.95                                     | [5]              |
| defect g-C <sub>3</sub> N <sub>4</sub> | UV-vis (300 W Xe lamp)                 | CO                               | 19.7                                      | [6]              |
| <b>1%Au/BKCN</b>                       | <b>300 W Xe lamp</b>                   | <b>CO</b>                        | <b>57.8</b>                               | <b>This work</b> |

## References

- 1 Y. Wang, X. Tang, P. Huo, Y. Yan, Z. Zhu, J. Dai, Z. Liu, Z. Li and H. Xi, Insight into the effect of the Cl 3p orbital on g-C<sub>3</sub>N<sub>4</sub> mimicking photosynthesis under CO<sub>2</sub> reduction, *J. Phys. Chem. C*, 2021, **125**, 9646-9656.
- 2 J. Fu, B. Zhu, C. Jiang, B. Cheng, W. You and J. Yu, Hierarchical porous O-doped g-C<sub>3</sub>N<sub>4</sub> with enhanced photocatalytic CO<sub>2</sub> reduction activity, *Small*, 2017, **13**, 1603938.
- 3 X. Li, C. Liu, D. Wu, J. Li, P. Huo and H. Wang, Improved charge transfer by size-dependent plasmonic Au on C<sub>3</sub>N<sub>4</sub> for efficient photocatalytic oxidation of RhB and CO<sub>2</sub> reduction, *Chinese J. Catal.*, 2019, **40**, 928-939.
- 4 H. Wang, Q. Tang and Z. Wu, Construction of few-layer Ti<sub>3</sub>C<sub>2</sub> MXene and boron-doped g-C<sub>3</sub>N<sub>4</sub> for enhanced photocatalytic CO<sub>2</sub> reduction, *ACS Sustainable Chem. Eng.*, 2021, **9**, 8425-8434.
- 5 M. K. Hussien, A. Sabbah, M. Qorbani, M. H. Elsayed, P. Raghunath, T.-Y. Lin, S. Quadir, H.-Y. Wang, H.-L. Wu, D.-L. M. Tzou, M.-C. Lin, P.-W. Chung, H.-H. Chou, L.-C. Chen and K.-H. Chen, Metal-free four-in-one modification of g-C<sub>3</sub>N<sub>4</sub> for superior photocatalytic CO<sub>2</sub> reduction and H<sub>2</sub> evolution, *Chem. Eng. J.*, 2022, **430**, 132853.
- 6 W. Ma, N. Wang, Y. Guo, L. Yang, M. Lv, X. Tang and S. Li, Enhanced photoreduction CO<sub>2</sub> activity on g-C<sub>3</sub>N<sub>4</sub>: by synergistic effect of nitrogen defective-enriched and porous structure, and mechanism insights, *Chem. Eng. J.*, 2020, **388**, 124288.
